# Supplementary material
Source: publisher figshare collection journal article supplement (https://acs.figshare.com/ndownloader/files/3934555)
Supplement: Supplementary file 1 [file 3934555]

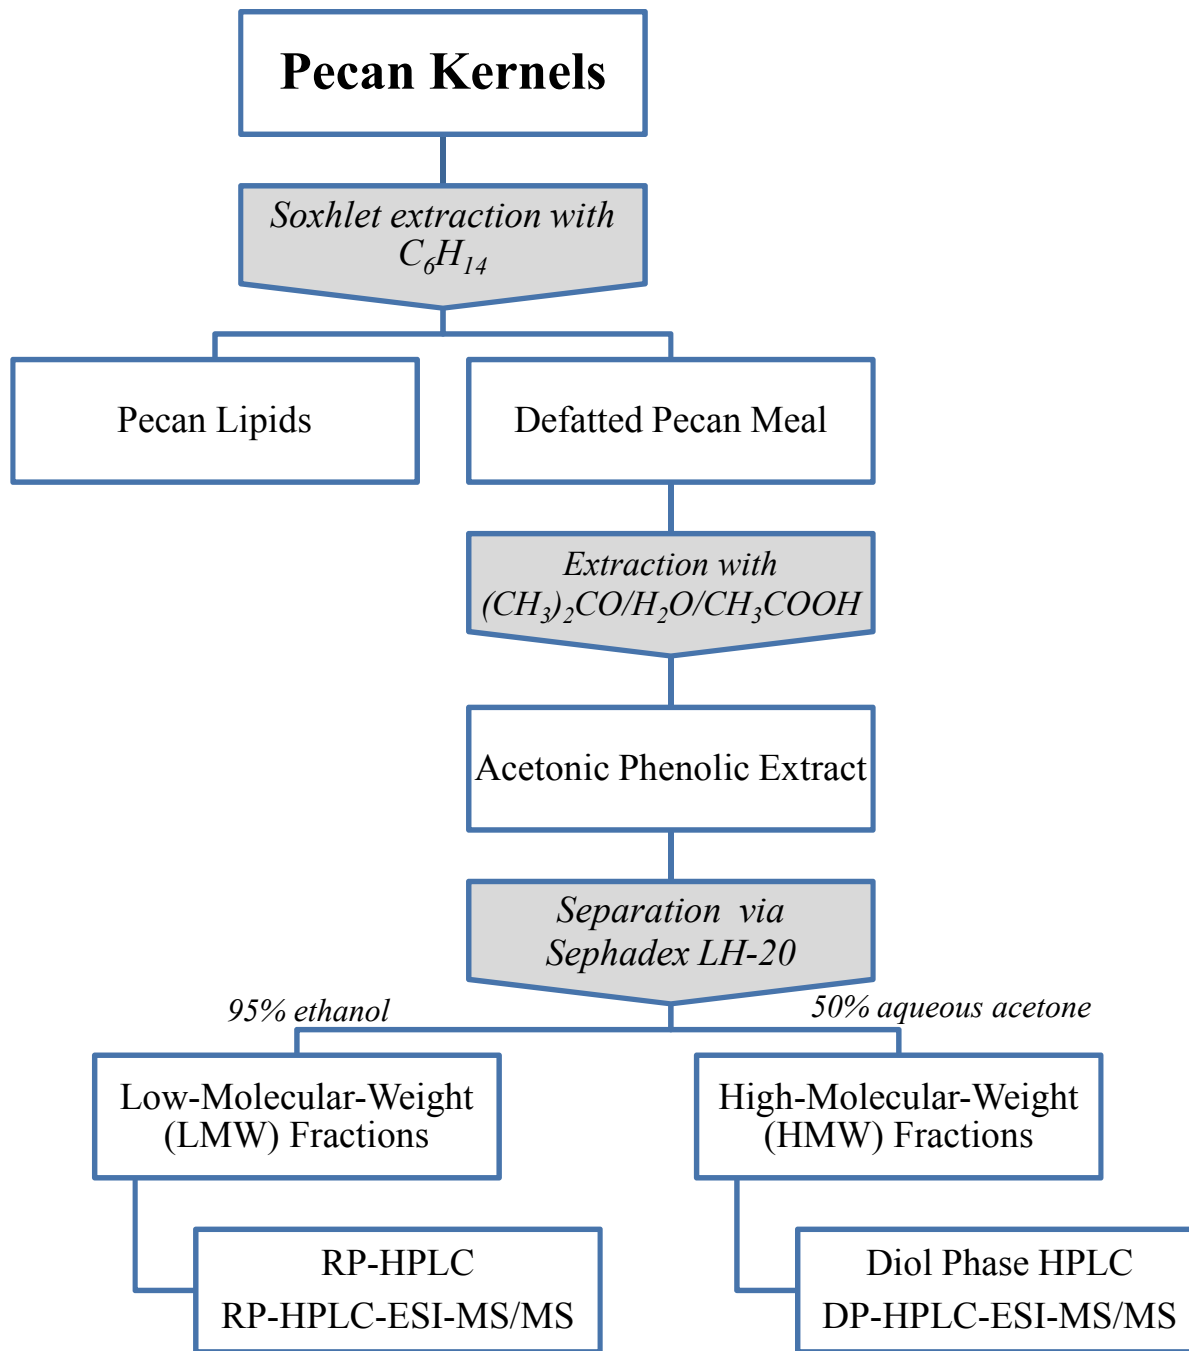

Flow diagram for the preparation of pecan LMW and HMW fractions from a Sephadex LH-20 column and their characterization.
